# Supplementary material for: Ultrasonic Transformation of Antibiotic Molecules into a Selective Chemotherapeutic Nanodrug
Source: MDPI journal article supplement (doi:10.3390/molecules28134927), 2023-06-22
Supplement: s1 [file s1]

## Supplementary Materials

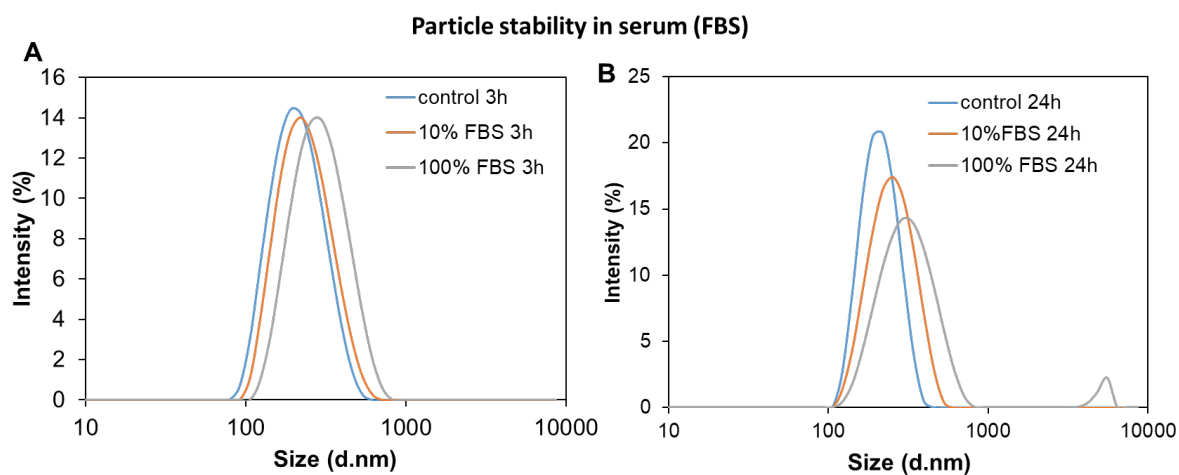

**Figure S1.** Size distribution of DoxyNPs incubated in 10% and 100% FBS for 3 h (A) and 24 h (B) measured by dynamic light scattering after repeated washing.

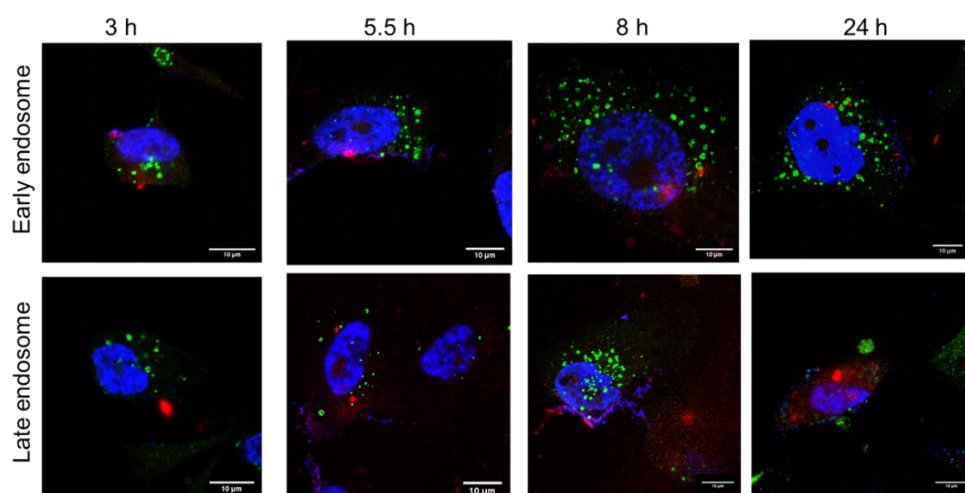

**Figure S2.** Confocal microscopy imaging of monitoring intracellular interaction between DoxyNPs and MDA-MB-231 cells as function of time up to 24 h. Representative of merged channel images of the MDA-MB-231 cells exposed for 3 h, 5.5 h, 8 h, 24h to DoxyNPs (red signal) and stained for early and late endosome (green signal). Blue signal represents nuclei acid, stained with Hoechst.

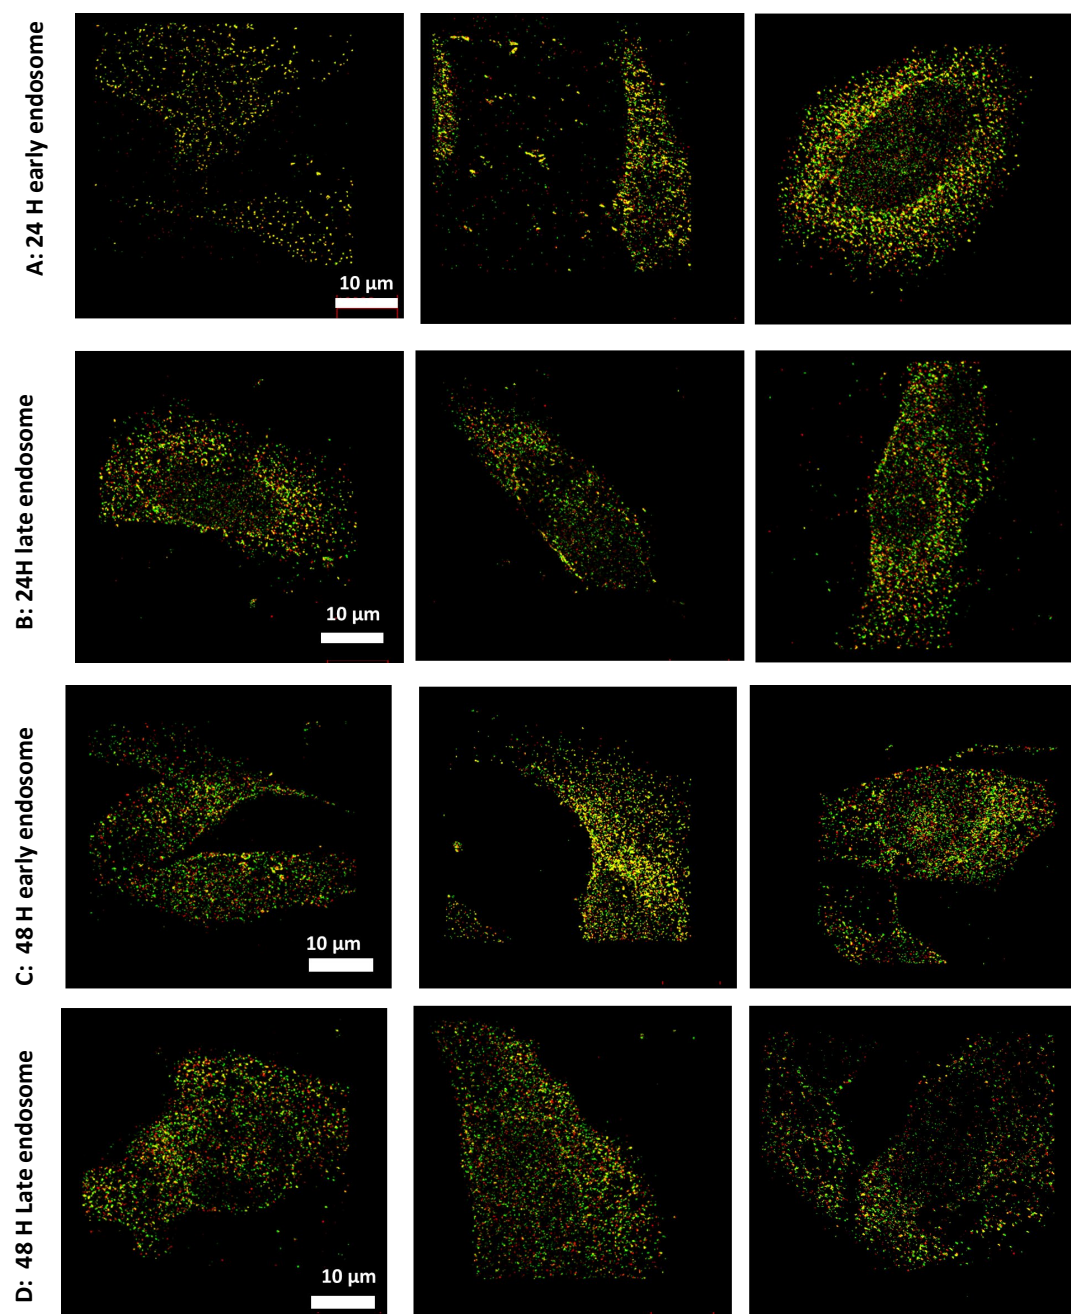

**Figure S3.** Intracellular tracking study of DoxyNPs in MDA-MB-231 cells by stochastic optical reconstruction microscopy (STORM). Representative multicolour STORM images of the MDA-MB-231 cells exposed for 24 h to DoxyNPs (red signal) and stained for early (A) and late endosome (B) (green signal). Figure C and D represent that of 48 h for early and late endosome, respectively. Scale bar is 10  $\mu\text{m}$ .

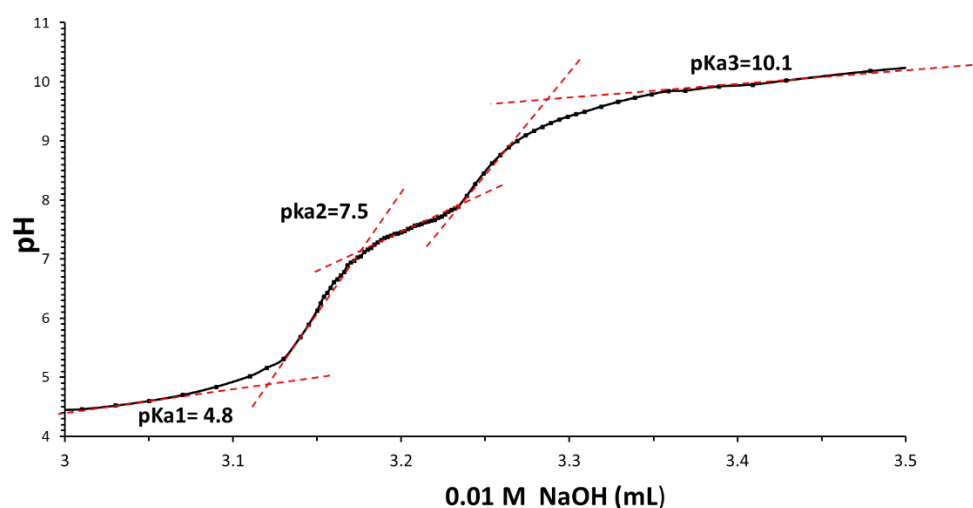

**Figure S4.** A potentiometric titration was performed to gain more insights into the mechanism of cellular interaction with DoxyNPs. The titration curve of DoxyNPs represented changes in pH as function of OH<sup>-</sup> concentration (addition of 0.01 M NaOH) in solution. DoxyNPs did not exhibit obvious buffering capacity in pH range of 5.5-6.5, which means that the endosomal escape of DoxyNPs probably cannot be ascribed to the “proton sponge effects”.

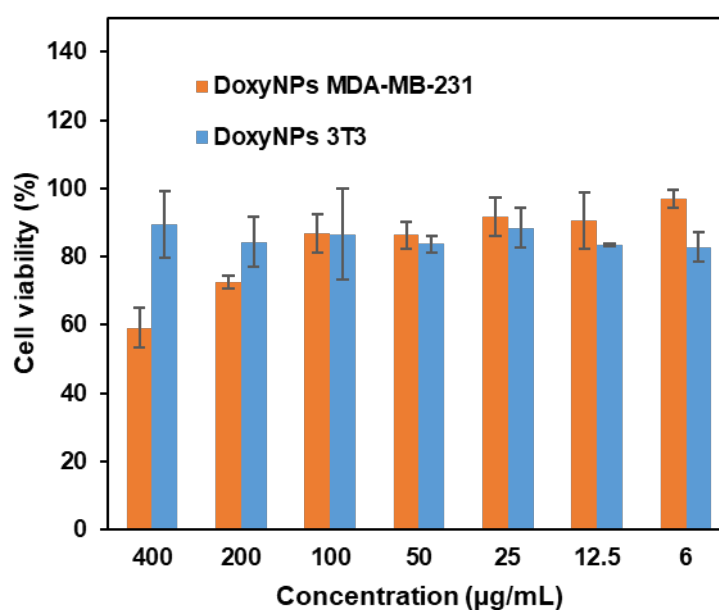

**Figure S5.** Cytotoxicity tests (MTT assay) of DoxyNPs on MDA-MB-231 cells and Fibroblast (3T3) after 72 h incubation at different concentrations. DoxyNPs showed selective antiproliferative activity on cancer cells and limited toxicity on healthy fibroblasts.
